1 **Spheroplast-mediated carbapenem tolerance in Gram-negative**  
2 **pathogens**

3

4 Trevor Cross <sup>\*1</sup>, Brett Ransegnola <sup>\*1</sup>, Jung-Ho Shin <sup>1</sup>, Anna Weaver <sup>1</sup>, Kathy Fauntleroy  
5 <sup>2</sup>, Michael VanNieuwenhze <sup>3</sup>, Lars F. Westblade <sup>2,4#</sup> and Tobias Dörr <sup>1#</sup>

6

7 <sup>1</sup>Weill Institute for Cell and Molecular Biology and Department of Microbiology, Cornell University, Ithaca,  
8 NY, USA

9 <sup>2</sup>Department of Pathology and Laboratory Medicine, Weill Cornell Medicine, New York, NY, USA

10 <sup>3</sup>Department of Molecular and Cellular Biochemistry and Department of Biology, Indiana University,  
11 Bloomington, IN, USA

12 <sup>4</sup>Division of Infectious Diseases, Department of Medicine, Weill Cornell Medicine, New York, NY, USA

13

14 \*These authors contributed equally to this work

15 #To whom correspondence should be addressed:

16 [tdoerr@cornell.edu](mailto:tdoerr@cornell.edu) or [law9067@med.cornell.edu](mailto:law9067@med.cornell.edu)

17

18 **Running title: Spheroplast-mediated carbapenem tolerance**

19

20 **Keywords:** antibiotic, carbapenem, carbapenemase, Gram-negative, L-  
21 form, meropenem, tolerance

22

23

24 **Abstract**

25 Antibiotic tolerance, the ability to temporarily sustain viability in the presence of  
26 bactericidal antibiotics, constitutes an understudied, yet likely widespread cause of  
27 antibiotic treatment failure. We have previously shown that the Gram-negative pathogen  
28 *Vibrio cholerae* is able to tolerate exposure to the typically bactericidal  $\beta$ -lactam antibiotics  
29 by assuming a spherical morphotype devoid of detectable cell wall material. However, it  
30 is unclear how widespread tolerance is. Here, we have tested a panel of clinically  
31 significant Gram-negative pathogens for their response to the potent, broad-spectrum  
32 carbapenem antibiotic meropenem. We show that clinical isolates of *Enterobacter*  
33 *cloacae*, *Klebsiella pneumoniae*, and *Klebsiella aerogenes*, but not *Escherichia coli*,  
34 exhibit moderate to high levels of tolerance to meropenem, both in laboratory growth  
35 medium and in human serum. Importantly, tolerance was mediated by cell wall-deficient  
36 spheroplasts, which readily recovered to wild-type morphology and exponential growth  
37 upon removal of antibiotic. Our results suggest that carbapenem tolerance is prevalent in  
38 clinically significant bacterial species, and we suggest that this could contribute to  
39 treatment failure associated with these organisms.

40

41

42

43

44

45

## 46 **Introduction**

47 Antibiotics are often differentiated by their ability to either inhibit growth (bacteriostatic) or  
48 to kill bacteria (bactericidal). The exact differentiation of antibiotics into these broad  
49 categories likely depends on the species and the specific growth environment in which  
50 antibiotic susceptibility is tested (1, 2). To optimize therapy, it is essential to gain a  
51 comprehensive understanding of the variable factors that modulate bacterial susceptibility  
52 to antibiotics. For example, the  $\beta$ -lactams (penicillins, cephalosporins, cephamycins,  
53 carbapenems, and the monobactam aztreonam), which are among the most powerful  
54 agents in our antibiotic armamentarium, prevent and/or corrupt proper cell wall  
55 (peptidoglycan) assembly (3, 4). Consequently, these agents typically induce cell death  
56 and lysis in susceptible bacteria at least during rapid growth *in vitro* (3, 4). However, *in*  
57 *vivo*  $\beta$ -lactams often fail to eradicate an infection caused by susceptible (*i.e.*, non-  
58 resistant) organisms (5-7). This paradox can, in part, be explained by the presence of  
59 dormant persister cells, a small subpopulation that resists killing by antibiotics that require  
60 cellular activity for their lethal action (8-10). However, specimens obtained from patients  
61 treated with  $\beta$ -lactam antibiotics have been reported to contain spheroplasts, bacterial  
62 cells that lack a cell wall (11)(3), and clinical isolates are often highly tolerant to  $\beta$ -lactam  
63 antibiotics at frequencies that cannot solely be explained by invoking rare persister cells  
64 (4,5)(12). Spheroplast formation suggests that in these bacteria the antibiotic is effective  
65 in inhibiting cell wall synthesis, demonstrating that some bacteria survive antibiotic  
66 exposure in forms that are neither dormant nor resistant. We and others have previously  
67 shown that two important Gram-negative pathogens, *Vibrio cholerae* and *Pseudomonas*  
68 *aeruginosa*, form viable, non-dividing spheroplasts when exposed to inhibitors of cell wall

69 synthesis (6,7)(13). Spheroplasts readily revert to rod-shape and exponential growth,  
70 suggesting these cells might promote re-infection upon discontinuation of antibiotic  
71 therapy. Successful recovery of *V. cholerae* spheroplasts requires the cell wall stress  
72 sensing two-component system VxrAB (also known as WigKR (14, 15)), cell wall  
73 synthesis functions and the general envelope stress-sensing alternative sigma factor  
74 RpoE (16).

75

76 Spheroplast formation is reminiscent of so-called Gram-positive “L-forms”: irregularly  
77 dividing, cell wall-less cells surrounded only by their cytoplasmic membranes (9).  
78 However, in striking contrast to L-forms, Gram-negative spheroplasts do not divide in the  
79 presence of antibiotic (13, 17). Division through an L-form-like mechanism is likely  
80 prevented by the presence of their strong outer membrane (OM) which exhibits almost  
81 cell wall-like mechanical properties (18). Indeed, dividing L-forms of the Gram-negative  
82 model organism *Escherichia coli* can be generated by inhibiting cell wall synthesis in  
83 osmostabilized growth medium, which causes the cytoplasm to “escape” its OM shell  
84 (19).

85

86 While L-form formation has been implicated as a mechanism of antibiotic resistance in  
87 Gram-positive bacteria (11), it is unclear whether spheroplast formation represents a  
88 general strategy elicited by Gram-negative bacteria to tolerate cell wall synthesis  
89 inhibitors such as the  $\beta$ -lactams. Here, we have tested a collection of well-characterized  
90 American Type Culture Collection (ATCC) and clinical Gram-negative isolates (**Table 1**)  
91 for their ability to tolerate exposure to the carbapenem antibiotic meropenem. We find

92 that, with the notable exception of *E. coli*, all isolates formed cell wall-deficient  
93 spheroplasts upon exposure to meropenem, and these spheroplasts were able to fully  
94 recover to rod-shape and exponential growth upon removal of meropenem, both in a  
95 laboratory medium and in human serum. Our data suggest that spheroplast-mediated  
96 carbapenem tolerance is prevalent in clinically significant Gram-negative pathogens, but  
97 rare or absent in the *E. coli* isolates tested herein. Our results suggest that measures of  
98 antibiotic susceptibility and ultimately treatment outcome could consider more nuanced  
99 responses in diverse, clinically-relevant Gram-negative pathogens.

100

## 101 **Results**

### 102 *Tolerance to Meropenem Varies Across Gram-Negative Clinical Isolates*

103 Spheroplast-mediated  $\beta$ -lactam tolerance might be an underappreciated menace in the  
104 clinical setting. To test how widespread the ability to tolerate cell wall acting antibiotics is  
105 in clinical isolates, we assayed a panel of clinical isolates representative of significant  
106 Gram-negative pathogens of the family *Enterobacteriaceae*: *E. coli*, including  
107 Enterohemorrhagic *E. coli* (EHEC), *Enterobacter cloacae*, *Klebsiella aerogenes* (formerly  
108 *Enterobacter aerogenes*), and *Klebsiella pneumoniae*. We also tested organisms known  
109 to form spheroplasts under some conditions: *V. cholerae* and *P. aeruginosa*. As a  
110 representative  $\beta$ -lactam, we used the carbapenem meropenem. We chose meropenem  
111 due to its importance as a potent, broad-spectrum agent (20, 21), and also because in  
112 clinical practice, especially in the setting of multi-drug resistance, it is often used against  
113 members of our isolate panel (20, 22).

114

115 We conducted time-dependent killing experiments measuring both colony forming units  
116 (cfu/ml) and optical density (OD<sub>600</sub>). Killing experiments for all isolates were conducted in  
117 supplemented Brain Heart Infusion (BHI+) broth under high inoculum/slow growth  
118 conditions (see Methods for details) to emulate the likely slow growth behavior during an  
119 infection (23). We chose a meropenem concentration (10 µg/mL), which is above the  
120 meropenem resistant breakpoint for *Enterobacteriaceae* [≥4 µg/mL], *P. aeruginosa* [≥8  
121 µg/mL], and *V. cholerae* [≥4 µg/mL] (24, 25) and between 6.7 × and 625 × higher than  
122 the minimum inhibitory concentration (MIC) for each susceptible/non-resistant, non-  
123 carbapenemase producing isolate (**Table 1**). Crucially, antibiotic susceptibility testing  
124 (AST) revealed that MIC values did not differ significantly between media Mueller Hinton  
125 agar [MHA] (recommended for AST by the Clinical and Laboratories Standards Institute  
126 (CLSI) (24, 25)) and BHI+ agar; the essential agreement (26) between MIC values on  
127 both media was 100% for all but one isolate (ARB0120, although the isolate exhibited  
128 MIC values greater than the meropenem resistant breakpoint on both MHA and BHI+  
129 agar) (**Table 1**), suggesting that AST performed with BHI+ is comparable with  
130 standardized methods. For comparison to the susceptible/non-resistant strains, we  
131 included a panel of conspecific clinical isolates that are carbapenem-resistant due to their  
132 possession of the carbapenemase KPC (*Klebsiella pneumoniae* carbapenemase).

133

134 Among the susceptible/non-resistant, non-carbapenemase producing isolates, killing and  
135 optical density dynamics varied widely between species and even isolates within the  
136 same species (e.g., *E. cloacae* WCM0001 versus *E. cloacae* ARB0008) (**Fig. 1**).  
137 Interestingly, both in lysis behavior and survival, *E. coli* was considerably less tolerant

138 than all other tested organisms (**Fig. 1**). While killing efficiency after 6 hours of  
139 meropenem exposure generally ranged from ~ 5 to 10-fold killing (*V. cholerae* N16961, *P.*  
140 *aeruginosa* PA14, *E. cloacae* WCM0001, *E. cloacae* ATCC 13047) to ~5,000-fold killing  
141 (*K. aerogenes* WCM0001, *E. cloacae* ARB0008, *K. pneumoniae* WCM0001 and  
142 WCM0002), both *E. coli* isolates tested were almost completely eradicated by  
143 meropenem (~10<sup>8</sup>-fold killing) (**Fig. 1, S1 - S2**). In contrast, almost all isolates grew well  
144 in the absence of meropenem, except for both isolates of *P. aeruginosa*, which exhibited  
145 slower growth in BHI+ compared to the other isolates (**Fig. S3**). Interestingly, *E. cloacae*  
146 ARB0008 had a higher meropenem MIC than the other *E. cloacae* isolates, but was  
147 among the isolates with the highest degree of killing. This observation suggests that  
148 susceptibility (*i.e.*, differences in MIC values) might not necessarily correlate with  
149 tolerance, *i.e.*, the degree of killing.

150

151 Similar to *V. cholerae* and *P. aeruginosa* (**Fig. S1 – S2** and (13)), survival of meropenem-  
152 treated cells often coincided with a substantial increase in OD<sub>600</sub> (while cfu/mL stayed the  
153 same or decreased)(**Fig. 1**), demonstrating that surviving cells are not dormant, but as a  
154 population continue to increase in mass. This was not observed in either isolate of *E. coli*,  
155 where a rapid decrease in OD<sub>600</sub> indicated lysis during meropenem exposure. Thus,  
156 meropenem tolerance (and potentially β-lactam tolerance in general) is appreciable in  
157 clinical isolates of some *Enterobacteriaceae*, but not observed (at least under conditions  
158 tested herein) in *E. coli*. In comparison to the susceptible isolates, and as expected, all  
159 KPC positive isolates increased in both OD<sub>600</sub> and cfu/ml during meropenem exposure  
160 (**Fig. S4**).

161

162 *Meropenem tolerant survivors are cell wall-deficient spheroplasts*

163 In *V. cholerae* and *P. aeruginosa*,  $\beta$ -lactam tolerant cells are cell wall-less, metabolically  
164 active spheroplasts. In principle, the moderate to high level tolerance we observed in our  
165 experiments could also be a consequence of unusually high levels of dormant persister  
166 cells in these clinical isolates due to a prolonged lag phase (27) emerging from stationary  
167 phase. To distinguish between these two possibilities, we withdrew samples at various  
168 time points following exposure to meropenem and imaged them. Dormant persister cells  
169 remain rod-shaped in the presence of cell wall acting antibiotics, since these cells prevent  
170 antibiotic damage completely through their lack of growth (28, 29). Visual examination  
171 revealed that, comparable to previous observations in *V. cholerae* and *P. aeruginosa*  
172 (6,7), the tolerant populations of almost all isolates consisted exclusively of spherical cells  
173 (**Fig. 2** and **S1- S2, S5 – S8**). The notable exception were the two *E. coli* isolates; while  
174 some spherical cells could be observed after short exposure periods in both tested  
175 isolates, after 6 hours of antibiotic exposure only cell debris was observed (**Fig. 2** and  
176 **Fig. S9**). In contrast to those cultures treated with meropenem, untreated bacteria  
177 retained rod-shape in BHI+ (**Fig. S10**); similar to the conspecific, but KPC positive,  
178 isolates with or without meropenem treatment (**Fig. S11**).

179

180 We next used the cell wall stain 7-hydroxycoumarin-amino-D-Alanine (HADA) (30) to test  
181 whether the observed spheroplasts were able to survive meropenem exposure by  
182 synthesizing cell wall material in a meropenem-insensitive manner, or by being able to  
183 sustain structural integrity in the absence of the cell wall. Indeed, osmotically stable, cell



184 wall-containing spherical cells that resemble spheroplasts can be observed in *E. coli*  
185 when the elongation-specific class B penicillin-binding protein (PBP) 2 is inhibited (31).  
186 Addition of HADA revealed little to no detectable cell wall material in meropenem-treated  
187 cells, but, consistent with published data from *E. coli*, did result in strong staining of PBP2-  
188 inhibited (*i.e.*, mecillinam-treated) cells (**Fig. 3**). The lack of detectable cell wall material  
189 in meropenem-treated cells, combined with their rapid loss of cell shape, suggests these  
190 spheroplasts maintain structural integrity through their outer membrane, rather than a  
191 reorganized cell wall. This is in line with the recent realization that the Gram-negative OM  
192 has a higher than appreciated mechanical load capacity (12). Lastly, loss of the cell wall  
193 is typically associated with inhibition of multiple PBPs that include class A PBPs (32).  
194 Meropenem has a high affinity for PBP2 (33), but also inhibits multiple other PBPs  
195 (PBP1a/b and PBP3) in *E. coli* and *P. aeruginosa* (34, 35) and our data suggest that at  
196 the concentration used here, multiple PBPs are inactivated.

197

198 If the observed spheroplasts are truly tolerant cells, they should readily revert to rod-  
199 shape (*i.e.*, wild-type shape) and exponential growth upon removal of the antibiotic. To  
200 test this, we withdrew samples after 6 hours of meropenem exposure, removed the  
201 antibiotic by addition of purified NDM-1 carbapenemase and imaged these cells in time-  
202 lapse. With varying frequencies roughly reflecting the different survival rates, at least  
203 some spheroplasts from all isolates were able to recover to rod-shape (**Fig. 4, Fig. S1 –**  
204 **S2, S5- S8**); albeit with different dynamics (*cf.* *E. cloacae* WCM0001 vs. *K. aerogenes*  
205 WCM0001). The recovery process often included rapid division (*e.g.*, 25 min after  
206 removing the antibiotic in *K. pneumoniae* WCM0001) as spherical cells, resulting in two

207 half-spheroplasts that then increasingly approximated rod-shape during subsequent  
208 division events. Taken together, our results suggest that the high tolerance levels  
209 observed for the Gram-negative pathogens tested here are not mediated by dormancy,  
210 or prolonged lag phase after stationary phase, but rather by the ability to survive for  
211 extended time periods without a structurally sound cell wall.

212

### 213 *Quantification of Gram-Negative Tolerance: The Weaver Score*

214 Since our observational data suggested variations in tolerance levels, we sought to  
215 quantify the ability to survive and maintain cellular structural integrity during exposure to  
216 meropenem. Assays to determine tolerance levels based on killing dynamics have been  
217 developed (10, 36); however, we chose to incorporate both cfu/mL and OD<sub>600</sub>  
218 measurements in our tolerance score. In principle, both cfu/mL (viability) and OD<sub>600</sub>  
219 measurements can report on tolerance to  $\beta$ -lactam antibiotics as both are indicators of  
220 the bacterial cell's ability to resist antibiotic-induced lysis. We argue that cell lysis and  
221 death can in principle be separable contributors to tolerance. We cannot exclude, for  
222 instance, that a significant proportion of antibiotic-damaged spheroplasts die only upon  
223 plating on solid media, a condition that results in oxidative stress (37). An isolate that  
224 exhibits a significant decrease in viability after exposure to a  $\beta$ -lactam but does not lyse  
225 would likely be given a low tolerance designator if cfu/mL only were considered. However,  
226 the spheroplasts that do not recover on plates might recover at a high rate under  
227 circumstances where cells are not plated following exposure (*e.g.*, in the host). Thus, we  
228 consider that OD<sub>600</sub> measurements (in conjunction with cfu/mL) hold informative value for  
229 tolerance measurements. We developed a meropenem survival/integrity score, the

230 Weaver tolerance score, by multiplying the fraction of survival (cfu/mL after 6 hours of  
231 treatment over initial cfu/mL) with the fraction of OD<sub>600</sub> readings (OD<sub>600</sub> reading after 6  
232 hours of treatment over initial OD<sub>600</sub> reading) (see Methods for details). We were thus  
233 able to generate a single value for overall tolerance that considers both parameters of the  
234 culture: lysis behavior and plating defect. According to this score, *V. cholerae* N16961, *P.*  
235 *aeruginosa* PA14 and the *E. cloacae* isolates WCM0001 and ATCC 13047 emerged as  
236 the most tolerant of the susceptible/non-resistant, non-carbapenemase producing  
237 organisms, while both tested *K. pneumoniae* and both *K. aerogenes* isolates exhibited  
238 intermediate tolerance, and *E. coli* ranked the lowest (**Fig. 5**). Consistent with their ability  
239 to grow in the presence of meropenem, the KPC- producing isolates scored the highest.

240

#### 241 *Spheroplast-formation in human serum*

242 To evaluate tolerance in an environment more reminiscent of growth in the human host,  
243 we performed killing experiments in human serum. Colony forming units (serum growth  
244 medium is incompatible with OD measurements) were measured after six hours of  
245 incubation with or without meropenem (**Fig. 6**) and cells were observed directly for  
246 spheroplast-formation. All isolates grew in serum growth medium (**Fig. 6B**), but compared  
247 to BHI+, killing by meropenem was reduced for some isolates. *K. aerogenes* ARB0007  
248 and *K. pneumoniae* WCM0001 were almost completely tolerant with only a ~5-fold  
249 decrease in viability over the 6 hour period, compared to the 10 to 100-fold killing that  
250 occurs in BHI+ with these isolates. Conversely, *E. cloacae* WCM0001 was killed at a  
251 higher rate in human serum than in BHI+. However, spheroplasts were observed for all  
252 isolates, except for *E. coli*, and recovery to rod-shape morphology and exponential growth

253 upon removal of the antibiotic by addition of NDM was efficient (**Fig. 6C**). Taken together,  
254 these data suggest that the degree of tolerance is growth-medium specific (though *E. coli*  
255 was still the least tolerant), but that spheroplast formation as a means of tolerating  
256 exposure to meropenem is conserved across bacteria and conditions tested here.

257

## 258 **Discussion**

259 In contrast to antibiotic resistance (the ability to grow in the presence of antibiotics), the  
260 phenomenon of antibiotic tolerance (the ability to resist killing by bactericidal antibiotics  
261 for extended time periods) remains understudied. While a lot of effort has been directed  
262 at understanding persister cells (9) (multidrug tolerant, dormant or near-dormant  
263 phenotypic variants produced as a small fraction of bacterial populations), it is unclear  
264 what other strategies might exist among bacteria to resist killing by ordinarily bactericidal  
265 antibiotics. We and others have previously described a tolerance mechanism (via  
266 formation of stable spheroplasts) by which Gram-negative bacteria are able to survive the  
267 normally lethal event of cell wall removal that is caused by exposure to  $\beta$ -lactam  
268 antibiotics and other inhibitors of cell wall synthesis (13, 14, 16, 17). Cell wall-less Gram-  
269 negative spheroplasts are formed by the majority population, are not dormant (*i.e.*, not  
270 persisters), and presumably rely on their strong OM to maintain structural integrity (16).  
271 Here, we show that this phenomenon is more widespread than previously recognized.  
272 Gram-negative clinical isolates that are susceptible/non-resistant to meropenem as  
273 determined using conventional MIC-based methods failed to be eradicated at appreciable  
274 levels of antibiotic, and surviving cells were spheroplasts devoid of detectable cell wall  
275 material. Our data raise the possibility that rapid death and lysis of majority populations

276 after  $\beta$ -lactam therapy might be the exception, not the norm, in clinical practice. Therefore  
277 in addition to persister formation (8-10, 38), heteroresistance (39), and overt resistance  
278 (20), these data highlight a fourth potential mechanism for  $\beta$ -lactam therapy treatment  
279 failure.

280

281 Importantly, spheroplast-like structures have been isolated from patients that were  
282 infected with Gram-negative pathogens and treated with  $\beta$ -lactam antibiotics (3), raising  
283 the possibility that these cells are able to survive without a cell wall in the human host.  
284 Consistent with this idea, we have observed spheroplast formation in our collection of  
285 *Enterobacteriaceae* during exposure to meropenem in human serum growth medium.  
286 Therefore, we consider it likely that spheroplasts, similar to persisters, can be responsible  
287 for recalcitrant infections. Indeed, herein, we present the first evidence that carbapenem-  
288 induced spheroplasts in significant pathogens of the family *Enterobacteriaceae* can  
289 readily revert to rod-shape and exponential growth upon removal of carbapenem. While  
290 in some previous studies spheroplast formation has been noted (3,13)(40, 41), evidence  
291 of spheroplast recovery (*i.e.*, reversion to rod-shaped, exponentially growing cells) was  
292 lacking. As such, spheroplast formation has not been incorporated into models of  
293 antibiotic susceptibility, particularly in the host. In addition, Gram-negative bacteria  
294 typically used as model organisms in the laboratory lyse upon exposure to  $\beta$ -lactams in  
295 standard laboratory media (*e.g.*, LB broth) (42), creating the potential misconception that  
296 the standard response to inhibition of cell wall synthesis is lysis. Future experiments will  
297 determine if spheroplasts that are able to revert to a growing population are also observed

298 during infections in patients treated with  $\beta$ -lactam antibiotics, and if their formation  
299 correlates with treatment outcomes.

300

301 In addition to providing a reservoir for a large number of cells that can repopulate an  
302 infection after antibiotic therapy is discontinued, a majority population of damaged but  
303 recoverable cells, such as spheroplasts after antibiotic treatment, poses other health  
304 risks.  $\beta$ -lactam antibiotics have been suggested to induce the generation of reactive  
305 oxygen species as well as the SOS DNA damage response, and could thus have  
306 mutagenic potential (14,15). A large reservoir of damaged cells might therefore enhance  
307 the possibility of developing broad resistance to other antibiotics (16). Furthermore,  
308 though we did not test this directly, spheroplasts could in principle continue to produce  
309 virulence factors (toxins, proteases and other tissue damaging enzymes), and thus  
310 disease, during antibiotic therapy.

311

312 The spheroplasts observed here are reminiscent of L-forms in Gram-positive bacteria.  
313 However, unlike L-forms, Gram-negative spheroplasts fail to proliferate in the presence  
314 of antibiotics and only recover to rod-shape and exponential growth when the antibiotic is  
315 removed. L-form cell division relies on membrane lipid overproduction and subsequent  
316 stochastic blebbing (43). We speculate that in Gram-negative spheroplasts, L-form-like  
317 proliferation is prevented due to their cytoplasmic membranes being confined by their  
318 rigid OMs, thus preventing division through membrane blebs.

319

320 In summary, our work demonstrates that the ability to survive bactericidal  $\beta$ -lactam  
321 antibiotics does not solely rely on classical resistance or dormancy, but instead could also  
322 be dependent upon an intrinsic tolerance mechanism in Gram-negative pathogens that  
323 are otherwise fully susceptible to the damage induced by cell wall acting agents. Rather  
324 than preventing harmful effects of antibiotics (as in resistance and dormancy), these  
325 tolerant spheroplasts survive by circumventing the essentiality of the antibiotic's main  
326 target, the cell wall. Our observations underscore the necessity of studying clinical  
327 isolates to gain a more complete understanding of the complex processes underlying the  
328 susceptibility to antibiotics in clinical settings.

329

### 330 **Acknowledgements**

331 Research in the Dörr lab is supported by NIAID grant 1R01AI143704. Research in the  
332 VanNieuwenhze lab is supported by NIH grant GM113172. Isolates *E. cloacae* ARB0008,  
333 *K. aerogenes* ARB0007, *K. pneumoniae* ARB0120 and *P. aeruginosa* ARB0090 were  
334 obtained from the CDC and FDA Antibiotic Resistance Isolate Bank  
335 (<https://www.cdc.gov/drugresistance/resistance-bank/index.html>). Isolates *E. cloacae*  
336 complex 41952, *E. coli* 52862, and *K. aerogenes* 28944 were a gift from Barry Kreiswirth  
337 (Rutgers University, NJ). We thank Matthew K. Waldor (Harvard Medical School, MA) and  
338 Pamela V. Chang (Cornell University, NY) for the gift of *V. cholerae* N16961 and *E. coli*  
339 TUV93-0, respectively.

340

341

342

343

## 344 **Material and Methods**

### 345 *Chemicals, media and growth conditions*

346 Meropenem (TCI chemicals, Portland, OR) was formulated as a 10 mg/mL stock solution  
347 in distilled water and stored at -20°C. BHI+ medium (per liter: 17.5 g brain heart infusion  
348 from solids, 10.0 g pancreatic digest of gelatin, 2.0 g dextrose, 5.0 g sodium chloride, 2.5  
349 g disodium phosphate, 15.0 µg/mL hemin, 15.0 µg/mL NAD+) was purchased from RPI  
350 (Wilmington, NC) and prepared as a broth according to package instructions; with 15 g  
351 per liter agar added for solid media. All isolates were grown in supplemented BHI (BHI+)  
352 by adding nicotinamide adenine dinucleotide (NAD; Sigma-Aldrich, St. Louis, MO) and  
353 hemin (Beantown Chemical, Hudson, NH), both at a final concentration of 15 µg/mL. All  
354 isolates were grown overnight in a 37°C shaking incubator prior to initiating the  
355 experiment.

356

### 357 *Bacterial isolates*

358 Bacterial isolates are summarized in **Table 1**. Clinical isolates were identified to the  
359 species or complex level (in the case of *E. cloacae*) using matrix-assisted laser  
360 desorption/ionization-time of flight mass spectrometry (MALDI Biotyper, Bruker Daltonics,  
361 Inc., Billerica, MA) according to the manufacturer's instructions. Meropenem AST (**Table**  
362 **1**) was performed for all isolates using gradient diffusion (Etest, bioMérieux, Inc., Durham,  
363 NC) according to the manufacturer's instructions on both MHA and BHI+ agar (*i.e.*, solid  
364 media). Each day of testing, quality control testing of the Etest strips was performed on  
365 both MHA and BHI+ with *E. coli* ATCC 25922. In all cases, quality control passed on both



366 MHA and BHI+ agar. The resultant AST data obtained with MHA was interpreted using  
367 the CLSI M100-S29 (*Enterobacteriaceae* and *P. aeruginosa*) and M45 (*V. cholerae*)  
368 documents (24, 25). For the KPC-producing isolates the presence of the *bla*<sub>KPC</sub> gene was  
369 confirmed using the Xpert Carba-R assay (Cepheid, Sunnyvale, CA, USA) according to  
370 the manufacturer's instructions.

371

### 372 *Microscopy*

373 All images were taken on a Leica MDi8 microscope (Leica Microsystems, GmbH, Wetzlar,  
374 Germany) with a PECON TempController 2000-1 (Erbach, Germany), heated stage at 37  
375 °C for growth experiments, or room temperature for static images. Time-lapse microscopy  
376 was performed by imaging frames five minutes apart and data were processed in ImageJ  
377 (44). HADA stained cells were imaged at 365 nm excitation for one second exposure time.  
378 Images were minimally processed in ImageJ by subtracting background and adjusting  
379 brightness/contrast uniformly across all fluorescent images.

380

### 381 *Time-dependent killing experiments*

382 Overnight cultures of each isolate were grown at 37°C in liquid BHI+ medium and the  
383 following day diluted 1:10 in fresh, pre-warmed BHI+ medium containing a final  
384 concentration of 10 µg/mL meropenem. At each time-point, samples were diluted five-  
385 fold in blank medium and OD<sub>600</sub> was measured. At the same time point, viable cell counts  
386 were also assessed by 10-fold serially diluting cells in BHI+ and spot-plating 10 µL of  
387 each dilution on BHI+ agar plates. Colonies were counted after 24 hours growth at 30°C.

388 Images were taken by placing cells on BHI+ agarose pads (0.8 % [w/v] agarose). Cells  
389 were concentrated by centrifugation (8,000 x g, 5 min) where necessary.

390

391

#### 392 *Weaver tolerance score*

393 The tolerance score was calculated from measurements of OD<sub>600</sub> and cfu/mL after 6  
394 hours of exposure to meropenem. The score was calculated as  $(OD_{t6} / OD_{t0}) \times (cfu/mL_{t6} / cfu/mL_{t0})$ ; *i.e.*, OD-fold change multiplied with survival fraction.

396

#### 397 *Time-dependent killing assays in human serum*

398 To generate serum growth medium (SGM), human serum (Rockland Pharmaceuticals,  
399 Limerick, PA) was thawed on ice and diluted in Dulbecco's modified Eagle's medium  
400 (DMEM, VWR, Radnor, PA) to 40% (v/v). Bacteria were inoculated from frozen stocks  
401 into 300  $\mu$ L of SGM in Eppendorf tubes and incubated at 37 °C overnight without agitation.  
402 After incubation, cells were diluted 10-fold into 450  $\mu$ L of fresh SGM, followed by addition  
403 of meropenem (10  $\mu$ g/mL). Survival was measured by diluting and spot plating for cfu/mL  
404 at the indicated times. For recovery time-lapse images, cells were concentrated 10-fold  
405 (via centrifugation, 8,000 rcf for 5 min) and the antibiotic inactivated by addition of 5  $\mu$ L of  
406 purified NDM-1 (5 mg/mL). Time-lapse images were obtained at 37°C on SGM + 0.8%  
407 (w/v) agarose.

408

#### 409 *HADA staining following antibiotic treatment*

410 Cultures were grown shaking at 37°C BHI+ liquid media and subcultured the next day  
411 1:10 to total 1 mL volumes containing 50 µM HADA (30) (7-hydroxycoumarin-amino-D-  
412 Alanine) with or without meropenem (10 µg/mL). At each time-point, 100 µL of the culture  
413 was harvested and washed three times with 200 µL BHI+ by centrifugation (5 min, 8000  
414 x g) to remove antibiotic and excess HADA. After the third wash, cells were concentrated  
415 10-fold and imaged on BHI+ agarose pads (0.8 % [w/v] agarose). Where indicated, HADA  
416 staining/imaging was performed as described above after treatment with 20 µg/mL  
417 mecillinam (Sigma-Aldrich, St. Louis, MO). Images were analyzed in ImageJ and are  
418 minimally processed (background removal).

419

#### 420 *Purification of New Delhi Metallo-β-lactamase-1 (NDM-1)*

421 Isolate *E. cloacae* ATCC BAA-2468 was used as a template for the PCR-amplification of  
422 the *bla<sub>NDM-1</sub>* gene. SignalP 4.1 was used to predict the membrane-localization signal  
423 sequence of *NDM-1*. PCR primers BR\_83 (5'-  
424 cagcagcggcctggtgccgcgagccaGTGCATGCCCGGTGAAATCCG-3') and BR\_84 (5'-  
425 cagcttccttcgggctttgtagcagccgCATGGCTCAGCGCAGCTTGTC-3') were designed to  
426 amplify the gene without the predicted signal sequence. Following PCR using Q5 DNA-  
427 polymerase (New England Biolabs, Ipswich, MA) and the BR\_83/BR\_84 primer pair, the  
428 product was cloned into the pET1-5b N-terminal 6×His expression plasmid (New England  
429 Biolabs).

430

431 The plasmid was transformed by heat-shock into chemically competent *E. coli* BL21  
432 (DE3) cells (New England Biolabs). Using the transformed cells, 1 L LB medium cultures

433 were grown from single colonies shaking at 37°C. At OD<sub>600</sub> ~ 0.3, cells were induced with  
434 1 mM isopropyl-β-D-thiogalactopyranoside (Sigma-Aldrich, St. Louis, MO) and grown for  
435 an additional 3 hours at 37°C. Cells were harvested by centrifugation (20 min, 11,200 x  
436 g) and the pellets frozen at -80°C. After lysis by sonication, the protein was found to be  
437 insoluble. Insoluble protein pellets were resolubilized in 3 M urea (VWR, Radnor, PA) and  
438 purified using immobilized metal affinity chromatography using Ni-NTA resin (Qiagen,  
439 Hilden, Germany). Eluted proteins were renatured by three-step dialysis to a final buffer  
440 composition of 20 mM Tris, 150 mM NaCl, 50 μM ZnSO<sub>4</sub> and 30% (v/v) glycerol. The  
441 resulting protein was quantified by Bradford Assay (45) and its functionality verified in a  
442 biological assay by purified NDM-1's ability to restore growth of meropenem-susceptible  
443 *E. coli* MG1655 on agar containing meropenem (10 μg/mL).

444

## 445 **Figure Legends**

446

447 **Figure 1. Clinical Gram-negative pathogens exhibit variable degrees of killing after**  
448 **exposure to meropenem.** Overnight cultures of the indicated isolates were subcultured  
449 1:10 (final volume 5 mL) into pre-warmed BHI+ liquid medium supplemented with 10  
450 μg/mL meropenem. Optical density (OD<sub>600</sub>, dotted lines) and viable cell counts (cfu/mL,  
451 solid lines) were measured at the indicated time points. Error bars represent standard  
452 error of the mean of at least six biological replicates.

453

454 **Figure 2. Meropenem exposure induces spheroplast formation in Gram-negative**  
455 **pathogens.** Overnight cultures of the indicated isolates were subcultured 1:10 (final  
456 volume 5 mL) into pre-warmed BHI+ liquid medium containing 10 µg/mL meropenem and  
457 imaged at the indicated time points. Scale bar, 5 µm.

458

459 **Figure 3. Meropenem-treated spheroplasts have no detectable cell wall material.**  
460 The indicated isolates were grown in the presence of HADA and treated with either vehicle  
461 (no AB), meropenem (10 µg/mL), or mecillinam (20 µg/mL). After 6 hours, cells were  
462 washed and imaged using fluorescence microscopy.

463

464 **Figure 4. Meropenem-induced spheroplasts can recover to form an exponentially**  
465 **growing population.** Time-lapse montage of spheroplasts upon removal of meropenem  
466 after 6 hours of treatment. The antibiotic was removed by addition of purified NDM-1  
467 carbapenemase, followed by time-lapse microscopy on BHI+ agarose pads (0.8 % [w/v]  
468 agarose). Images were then acquired 5 min apart for another 2 hours. Both *E. coli* isolates  
469 were omitted since no spheroplasts were observed after 6 hours of meropenem  
470 treatment. Scale bars, 5 µm.

471

472 **Figure 5. Meropenem Tolerance Scores of Gram-negative Pathogens.** Relative  
473 tolerance to meropenem was quantified using the Weaver Score equation that is based  
474 upon viable cell concentration and optical density data for broth cultures exposed to 10  
475 µg/mL meropenem for 6 hours. The Weaver Score was calculated using the following  
476 equation:  $[(OD_{t6}/OD_{t0}) * (cfu/mL_{t6}/cfu/mL_{t0})]$ , and the resultant values arranged in

477 descending order indicating decreasing tolerance to meropenem. Error bars show  
478 standard error of the mean of at least six biological replicates.

479

480 **Figure 6. Spheroplast formation and recovery in human serum.** The indicated  
481 isolates were grown overnight in 40% (v/v) serum/DMEM liquid medium, diluted 10-fold  
482 into fresh serum/DMEM liquid medium and incubated in the presence **(A)** or absence **(B)**  
483 of 10 µg/mL meropenem. Cells were plated (cfu/mL) at the indicated time points. After 6  
484 hours of incubation, purified NDM-1 carbapenemase was added to remove meropenem,  
485 followed by time-lapse microscopy on agarose pads containing 40% (v/v) human serum  
486 **(C)**. All values represent the mean of three biological replicates, error bars represent  
487 standard error of the mean. Red circle indicates the first steps of a recovering spheroplast  
488 within cell debris.

489

## 490 **Supplemental Figure Legends**

491

### 492 **Figure S1. Spheroplast formation and recovery in *V. cholerae* N16961**

493 **(A)** Survival (cfu/mL, blue; OD<sub>600</sub>, red) in the presence of 10 µg/mL meropenem; error  
494 bars show the standard error of the mean of three biological replicates. **(B)** Spheroplast  
495 formation at 0, 1, 3, and 6 hours after exposure to 10 µg/mL meropenem. **(C)** Time-lapse  
496 images showing recovery upon removal of meropenem with purified NDM-1  
497 carbapenemase (frames were acquired 5 min apart). Scale bars, 5 µm.

498

### 499 **Figure S2. Spheroplast formation and recovery in *P. aeruginosa* PA14**

500 **(A)** Survival (cfu/mL, blue; OD<sub>600</sub>, red) in the presence of 10 µg/mL meropenem, error  
501 bars show the standard error of the mean of three biological replicates. **(B)** Spheroplast  
502 formation at 0, 1, 3, and 6 hours after exposure to 10 µg/mL meropenem. **(C)** Time-lapse  
503 montage of spheroplasts upon removal of meropenem after 6 hours of treatment. The  
504 antibiotic was removed by addition of purified NDM-1 carbapenemase, followed by time-  
505 lapse microscopy on BHI+ agarose pads (0.8 % [w/v] agarose). Images were then  
506 acquired 5 min apart for another 2 hours. Both *E. coli* isolates were omitted since no  
507 spheroplasts were observed after 6 hours of meropenem treatment. Scale bars, 5 µm.

508

509 **Figure S3. Growth of susceptible/non-resistant and carbapenemases-producing**  
510 **isolates without antibiotic treatment.**

511 Growth of the indicated isolates in BHI+ (cfu/mL, solid lines; OD<sub>600</sub>, dotted lines), error  
512 bars show standard error of the mean of two biological replicates.

513

514 **Figure S4. Growth of KPC-producing *Enterobacteriaceae* in the presence of**  
515 **meropenem.** Growth of the indicated isolates in BHI+ (cfu/mL, solid lines; OD<sub>600</sub>, dotted  
516 lines) supplemented with 10 µg/mL meropenem, error bars show standard error of the  
517 mean of two biological replicates.

518

519 **Figure S5. Spheroplast formation and recovery in *E. cloacae* ATCC 13047**

520 **(A)** Spheroplast formation at 0, 1, 3, and 6 hours after exposure to 10 µg/mL meropenem  
521 in BHI+. **(B)** Time-lapse montage of spheroplast recovery upon removal of meropenem  
522 after 6 hours of treatment. The antibiotic was removed by addition of purified NDM-1

523 carbapenemase, followed by time-lapse microscopy on BHI+ agarose pads (0.8 % [w/v]  
524 agarose). Images were acquired 5 min apart for another 2 hours. Scale bars, 5  $\mu$ m.

525

526 **Figure S6. Spheroplast formation and recovery in *K. aerogenes* ARB0007**

527 **(A)** Spheroplast formation at 0, 1, 3, and 6 hours after exposure to 10  $\mu$ g/mL meropenem  
528 in BHI+. **(B)** Time-lapse montage of spheroplast recovery upon removal of meropenem  
529 after 6 hours of treatment. The antibiotic was removed by addition of purified NDM-1  
530 carbapenemase, followed by time-lapse microscopy on BHI+/0.8% (w/v) agarose. Images  
531 were acquired 5 min apart for another 2 hours. Scale bars, 5  $\mu$ m.

532

533 **Figure S7. Spheroplast formation and recovery in *K. pneumoniae* WCM0002**

534 **(A)** Spheroplast formation at 0, 1, 3, and 6 hours after exposure to 10  $\mu$ g/mL meropenem.  
535 **(B)** Time-lapse montage of spheroplast recovery upon removal of meropenem after 6  
536 hours of treatment. The antibiotic was removed by addition of purified NDM-1  
537 carbapenemase, followed by time-lapse microscopy on BHI+ agarose pads (0.8 % [w/v]  
538 agarose). Images were acquired 5 min apart for another 2 hours. Scale bars, 5  $\mu$ m.

539

540 **Figure S8. Spheroplast formation and recovery in *E. cloacae* ARB0008**

541 **(A)** Spheroplast formation at 0, 1, 3, and 6 hours after exposure to 10  $\mu$ g/mL meropenem.  
542 **(B)** Time-lapse montage of spheroplast recovery upon removal of meropenem after 6  
543 hours of treatment. The antibiotic was removed by addition of purified NDM-1  
544 carbapenemase, followed by time-lapse microscopy on BHI+ agarose pads (0.8 % [w/v]  
545 agarose). Images were acquired 5 min apart for another 2 hours. Scale bars, 5  $\mu$ m.



546

547 **Figure S9. Absence of spheroplasts in *E. coli* isolates.** Overnight cultures of *E. coli*  
548 WCM0001 **(A)**, and TUV93-0 **(B)** were subcultured 1:10 (final volume 5 mL) into pre-  
549 warmed BHI+ liquid medium supplemented with 10 µg/mL meropenem and imaged at the  
550 indicated time points. Scale bar, 5 µm.

551

552 **Figure S10. Cell Morphology without antibiotic treatment.** Overnight cultures of the  
553 indicated isolates were diluted 10-fold into BHI+ liquid media, and imaged at the indicated  
554 time points. Scale bar, 5 µm.

555

556 **Figure S11. Cell Morphology of KPC-producing *Enterobacteriaceae*.**

557 Overnight cultures of the indicated isolates were diluted 10-fold into fresh BHI+ liquid  
558 media containing vehicle **(A)**, or meropenem (10 µg/mL) **(B)**, and imaged at the indicated  
559 time points. Scale bar, 5 µm.

560

## 561 **References**

562

563

- 564 1. Nemeth J, Oesch G, Kuster SP. 2015. Bacteriostatic versus bactericidal  
565 antibiotics for patients with serious bacterial infections: systematic review and  
566 meta-analysis. *J Antimicrob Chemother* 70:382-95.
- 567 2. Balouiri M, Sadiki M, Ibnsouda SK. 2016. Methods for in vitro evaluating  
568 antimicrobial activity: A review. *J Pharm Anal* 6:71-79.
- 569 3. Cho H, Uehara T, Bernhardt TG. 2014. Beta-lactam antibiotics induce a lethal  
570 malfunctioning of the bacterial cell wall synthesis machinery. *Cell* 159:1300-11.
- 571 4. Tomasz A. 1979. From penicillin-binding proteins to the lysis and death of  
572 bacteria: a 1979 view. *Rev Infect Dis* 1:434-67.
- 573 5. Gonzalez BE, Martinez-Aguilar G, Mason EO, Jr., Kaplan SL. 2004. Azithromycin  
574 compared with beta-lactam antibiotic treatment failures in pneumococcal  
575 infections of children. *Pediatr Infect Dis J* 23:399-405.

- 576 6. Lemaitre BC, Mazigh DA, Scavizzi MR. 1991. Failure of beta-lactam antibiotics  
577 and marked efficacy of fluoroquinolones in treatment of murine *Yersinia*  
578 *pseudotuberculosis* infection. *Antimicrob Agents Chemother* 35:1785-90.
- 579 7. Patel JA, Reisner B, Vizirinia N, Owen M, Chonmaitree T, Howie V. 1995.  
580 Bacteriologic failure of amoxicillin-clavulanate in treatment of acute otitis media  
581 caused by nontypeable *Haemophilus influenzae*. *The Journal of Pediatrics*  
582 126:799-806.
- 583 8. Conlon BP, Rowe SE, Lewis K. 2015. Persister cells in biofilm associated  
584 infections. *Adv Exp Med Biol* 831:1-9.
- 585 9. Lewis K. 2010. Persister Cells. *Annual Review of Microbiology* 64:357-372.
- 586 10. Brauner A, Fridman O, Gefen O, Balaban NQ. 2016. Distinguishing between  
587 resistance, tolerance and persistence to antibiotic treatment. *Nature Reviews*  
588 *Microbiology* 14:320-330.
- 589 11. Roberts D, Higgs E, Rutman a, Cole P. 1984. Isolation of spheroplastic forms of  
590 *Haemophilus influenzae* from sputum in conventionally treated chronic bronchial  
591 sepsis using selective medium supplemented with N-acetyl-D-glucosamine:  
592 possible reservoir for re-emergence of infection. *British medical journal (Clinical*  
593 *research ed)* 289:1409-12.
- 594 12. Bergeron MG, Lavoie GY. 1985. Tolerance of *Haemophilus influenzae* to beta-  
595 lactam antibiotics. *Antimicrob Agents Chemother* 28:320-5.
- 596 13. Dorr T, Davis BM, Waldor MK. 2015. Endopeptidase-mediated beta lactam  
597 tolerance. *PLoS Pathog* 11:e1004850.
- 598 14. Dörr T, Alvarez L, Delgado F, Davis BM, Cava F, Waldor MK. 2016. A cell wall  
599 damage response mediated by a sensor kinase/response regulator pair enables  
600 beta-lactam tolerance. *Proceedings of the National Academy of Sciences*  
601 113:404-409.
- 602 15. Cheng AT, Ottemann KM, Yildiz FH. 2015. *Vibrio cholerae* Response Regulator  
603 VxrB Controls Colonization and Regulates the Type VI Secretion System. *PLoS*  
604 *Pathog* 11:e1004933.
- 605 16. Weaver AI, Murphy SG, Umans BD, Tallavajhala S, Onyekwere I, Wittels S, Shin  
606 JH, VanNieuwenhze M, Waldor MK, Dorr T. 2018. Genetic Determinants of  
607 Penicillin Tolerance in *Vibrio cholerae*. *Antimicrob Agents Chemother* 62.
- 608 17. Monahan LG, Turnbull L, Osvath SR, Birch D, Charles IG, Whitchurch CB. 2014.  
609 Rapid conversion of *Pseudomonas aeruginosa* to a spherical cell morphotype  
610 facilitates tolerance to carbapenems and penicillins but increases susceptibility to  
611 antimicrobial peptides. *Antimicrobial Agents and Chemotherapy* 58:1956-1962.
- 612 18. Rojas ER, Billings G, Odermatt PD, Auer GK, Zhu L, Miguel A, Chang F, Weibel  
613 DB, Theriot JA, Huang KC. 2018. The outer membrane is an essential load-  
614 bearing element in Gram-negative bacteria. *Nature* 559:617-621.
- 615 19. Billings G, Ouzounov N, Ursell T, Desmarais SM, Shaevitz J, Gitai Z, Huang KC.  
616 2014. De novo morphogenesis in L-forms via geometric control of cell growth.  
617 *Mol Microbiol* 93:883-96.
- 618 20. Bonomo RA, Burd EM, Conly J, Limbago BM, Poirel L, Segre JA, Westblade LF.  
619 2018. Carbapenemase-Producing Organisms: A Global Scourge. *Clin Infect Dis*  
620 66:1290-1297.

- 621 21. Breilh D, Texier-Maugein J, Allaouchiche B, Saux MC, Boselli E. 2013.  
622 Carbapenems. *J Chemother* 25:1-17.
- 623 22. Baldwin CM, Lyseng-Williamson KA, Keam SJ. 2008. Meropenem: a review of its  
624 use in the treatment of serious bacterial infections. *Drugs* 68:803-38.
- 625 23. Haugan MS, Charbon G, Frimodt-Moller N, Lobner-Olesen A. 2018.  
626 Chromosome replication as a measure of bacterial growth rate during  
627 *Escherichia coli* infection in the mouse peritonitis model. *Sci Rep* 8:14961.
- 628 24. CLSI. Performance Standards for Antimicrobial Susceptibility Testing. 29<sup>th</sup> ed.  
629 CLSI supplement M100. Wayne, PA: Clinical and Laboratory Standards Institute;  
630 2019.
- 631 25. CLSI. Methods for Antimicrobial Dilution and Disk Susceptibility Testing of  
632 Infrequently Isolated or Fastidious Bacteria. 3<sup>rd</sup> ed. Wayne, PA: Clinical and  
633 Laboratory Standards Institute; 2019.
- 634 26. Patel JB, Sharp S, Novak-Weekley S. 2013. Verification of Antimicrobial  
635 Susceptibility Testing Methods: A practical approach. *Clinical Microbiology  
636 Newsletter* 35:103-109.
- 637 27. Fridman O, Goldberg A, Ronin I, Shores N, Balaban NQ. 2014. Optimization of  
638 lag time underlies antibiotic tolerance in evolved bacterial populations. *Nature*  
639 513:418-21.
- 640 28. Shah D, Zhang Z, Khodursky A, Kaldalu N, Kurg K, Lewis K. 2006. Persisters: a  
641 distinct physiological state of *E. coli*. *BMC Microbiol* 6:53.
- 642 29. Balaban NQ, Merrin J, Chait R, Kowalik L, Leibler S. 2004. Bacterial persistence  
643 as a phenotypic switch. *Science* 305:1622-5.
- 644 30. Kuru E, Hughes HV, Brown PJ, Hall E, Tekkam S, Cava F, de Pedro MA, Brun  
645 YV, VanNieuwenhze MS. 2012. In Situ probing of newly synthesized  
646 peptidoglycan in live bacteria with fluorescent D-amino acids. *Angew Chem Int  
647 Ed Engl* 51:12519-23.
- 648 31. Ranjit DK, Young KD. 2013. The Rcs stress response and accessory envelope  
649 proteins are required for de novo generation of cell shape in *Escherichia coli*. *J  
650 Bacteriol* 195:2452-62.
- 651 32. Satta G, Cornaglia G, Mazzariol A, Golini G, Valisena S, Fontana R. 1995.  
652 Target for bacteriostatic and bactericidal activities of beta-lactam antibiotics  
653 against *Escherichia coli* resides in different penicillin-binding proteins. *Antimicrob  
654 Agents Chemother* 39:812-8.
- 655 33. Zhanel GG, Simor AE, Vercaigne L, Mandell L, Canadian Carbapenem  
656 Discussion G. 1998. Imipenem and meropenem: Comparison of in vitro activity,  
657 pharmacokinetics, clinical trials and adverse effects. *Can J Infect Dis* 9:215-28.
- 658 34. Sumita Y, Fukasawa M. 1995. Potent activity of meropenem against *Escherichia  
659 coli* arising from its simultaneous binding to penicillin-binding proteins 2 and 3. *J  
660 Antimicrob Chemother* 36:53-64.
- 661 35. Sumita Y, Tada E, Nouda H, Okuda T, Fukasawa M. 1992. Mode of action of  
662 meropenem, a new carbapenem antibiotic. *Chemotherapy* 40:90-102.
- 663 36. Gefen O, Chekol B, Strahilevitz J, Balaban NQ. 2017. TDtest: Easy detection of  
664 bacterial tolerance and persistence in clinical isolates by a modified disk-diffusion  
665 assay. *Scientific Reports* 7:1-9.

- 666 37. Cuny C, Lesbats M, Dukan S. 2007. Induction of a global stress response during  
667 the first step of *Escherichia coli* plate growth. *Appl Environ Microbiol* 73:885-9.
- 668 38. Lewis K. 2007. Persister cells, dormancy and infectious disease. *Nat Rev*  
669 *Microbiol* 5:48-56.
- 670 39. El-Halfawy OM, Valvano MA. 2015. Antimicrobial heteroresistance: an emerging  
671 field in need of clarity. *Clin Microbiol Rev* 28:191-207.
- 672 40. MacKenzie FM, Gould IM, Chapman DG, Jason D. 1994. Postantibiotic effect of  
673 meropenem on members of the family Enterobacteriaceae determined by five  
674 methods. *Antimicrob Agents Chemother* 38:2583-9.
- 675 41. Van Laar TA, Chen T, You T, Leung KP. 2015. Sublethal concentrations of  
676 carbapenems alter cell morphology and genomic expression of *Klebsiella*  
677 *pneumoniae* biofilms. *Antimicrob Agents Chemother* 59:1707-17.
- 678 42. Chung HS, Yao Z, Goehring NW, Kishony R, Beckwith J, Kahne D. 2009. Rapid  
679 beta-lactam-induced lysis requires successful assembly of the cell division  
680 machinery. *Proc Natl Acad Sci U S A* 106:21872-7.
- 681 43. Mercier R, Kawai Y, Errington J. 2013. Excess membrane synthesis drives a  
682 primitive mode of cell proliferation. *Cell* 152:997-1007.
- 683 44. Rueden CT, Schindelin J, Hiner MC, DeZonia BE, Walter AE, Arena ET, Eliceiri  
684 KW. 2017. ImageJ2: ImageJ for the next generation of scientific image data.  
685 *BMC Bioinformatics* 18:529.
- 686 45. Bradford MM. 1976. A rapid and sensitive method for the quantitation of  
687 microgram quantities of protein utilizing the principle of protein-dye binding. *Anal*  
688 *Biochem* 72:248-54.
- 689  
690  
691  
692  
693  
694  
695  
696  
697  
698  
699  
700  
701  
702  
703  
704  
705  
706  
707  
708  
709  
710  
711

712 **Table 1.** Bacterial isolates evaluated in this study.  
713

| Isolate                                        | Carbapenemase | Specimen Source   | MHA MIC (µg/mL) | MHA MIC Interpretation <sup>f</sup> | BHI+ Agar MIC (µg/mL) | BHI+ Agar MIC Interpretation <sup>h</sup> |
|------------------------------------------------|---------------|-------------------|-----------------|-------------------------------------|-----------------------|-------------------------------------------|
| <i>E. cloacae</i> complex WCM0001              | N/A           | Blood             | 0.023           | SUS                                 | 0.023                 | N/A                                       |
| <i>E. cloacae</i> complex ATCC 13047           | N/A           | N/A               | 0.064           | SUS                                 | 0.094                 | N/A                                       |
| <i>E. cloacae</i> complex ARB0008 <sup>a</sup> | N/A           | N/A               | 0.75            | SUS                                 | 1.5                   | N/A                                       |
| <i>E. coli</i> WCM0001                         | N/A           | Urine             | 0.016           | SUS                                 | 0.016                 | N/A                                       |
| <i>E. coli</i> TUV93-0                         | N/A           | N/A               | 0.023           | SUS                                 | 0.023                 | N/A                                       |
| <i>K. aerogenes</i> WCM0001                    | N/A           | Respiratory/Sinus | 0.032           | SUS                                 | 0.032                 | N/A                                       |
| <i>K. aerogenes</i> ARB0007                    | N/A           | N/A               | 0.064           | SUS                                 | 0.047                 | N/A                                       |
| <i>K. pneumoniae</i> WCM0001                   | N/A           | Blood             | 0.032           | SUS                                 | 0.023                 | N/A                                       |
| <i>K. pneumoniae</i> WCM0002                   | N/A           | Respiratory/Sinus | 0.032           | SUS                                 | 0.032                 | N/A                                       |
| <i>P. aeruginosa</i> PA14                      | N/A           | N/A               | 0.25            | SUS                                 | 0.38                  | N/A                                       |
| <i>V. cholerae</i> N16961                      | N/A           | N/A               | 0.125           | SUS                                 | 0.125                 | N/A                                       |
| <i>E. cloacae</i> complex ATCC BAA-2468        | NDM           | N/A               | >32             | RES                                 | >32                   | N/A                                       |
| <i>E. cloacae</i> complex 41952                | KPC           | N/A               | >32             | RES                                 | >32                   | N/A                                       |
| <i>K. pneumoniae</i> ARB0120 <sup>b</sup>      | KPC           | N/A               | 12 <sup>d</sup> | RES                                 | 32 <sup>g</sup>       | N/A                                       |
| <i>E. coli</i> 52862                           | KPC           | N/A               | 12              | RES                                 | 8                     | N/A                                       |
| <i>P. aeruginosa</i> ARB0090 <sup>c</sup>      | KPC           | N/A               | >32             | RES                                 | >32                   | N/A                                       |
| <i>K. aerogenes</i> 28944                      | KPC           | N/A               | 3 <sup>e</sup>  | RES                                 | 3                     | N/A                                       |

714  
715 **Abbreviations:** ARB, Centers for Disease Control and Prevention and United States Food and Drug Administration Antibiotic Resistance Isolate  
716 Bank; ATCC, American Type Culture Collection; BHI+, Brain-Hearth Infusion agar with supplements; INT, intermediate; MHA, Mueller Hinton agar;  
717 MIC, minimum inhibitory concentration; N/A, not applicable; RES, resistant; SUS, susceptible; WCM, Weill Cornell Medicine.

718  
719 <sup>a</sup> ARB0008, meropenem MIC value determined by the ARB, 2 µg/mL (INT). The MIC value obtained using BHI+ agar is consistent with an  
720 interpretation of INT.

721 <sup>b</sup> ARB0120, meropenem MIC value determined by the ARB, >8 µg/mL (RES).

722 <sup>c</sup> ARB0090, meropenem MIC value determined by the ARB, >8 µg/mL (RES).

723 <sup>d</sup> The isolate intersected the meropenem Etest strip between 8 to 12 µg/mL.

724 <sup>e</sup> When interpreting MIC values generated using gradient diffusion (Etest), MIC values that fall between conventional two-fold dilutions (e.g., 0.25  
725 µg/mL, 0.5 µg/mL, 1 µg/mL, 2 µg/mL, 4 µg/mL, etc.) are rounded up to the next upper two-fold value before categorization. Therefore, an MIC  
726 value of 3 µg/mL would be rounded up to 4 µg/mL, and thus considered resistant using breakpoints for *Enterobacteriaceae* in the M100-S29  
727 document.

728 <sup>f</sup> Data were interpreted using the Clinical and Laboratories Standards Institute M100-S29 and M45 documents.

729 <sup>g</sup> The isolate intersected the meropenem Etest strip between 24-32 µg/mL.

730 <sup>h</sup> There are no interpretative criteria for antibiotic susceptibility testing performed on BHI+ agar. Nonetheless, essential agreement between MHA  
731 and BHI+ agar was 100% for all isolates except ARB0120. However, ARB0120 tested resistant to meropenem ( $\geq 4$  µg/mL) on both media and in  
732 agreement with data obtained by the ARB ( $> 8$  µg/mL).

733

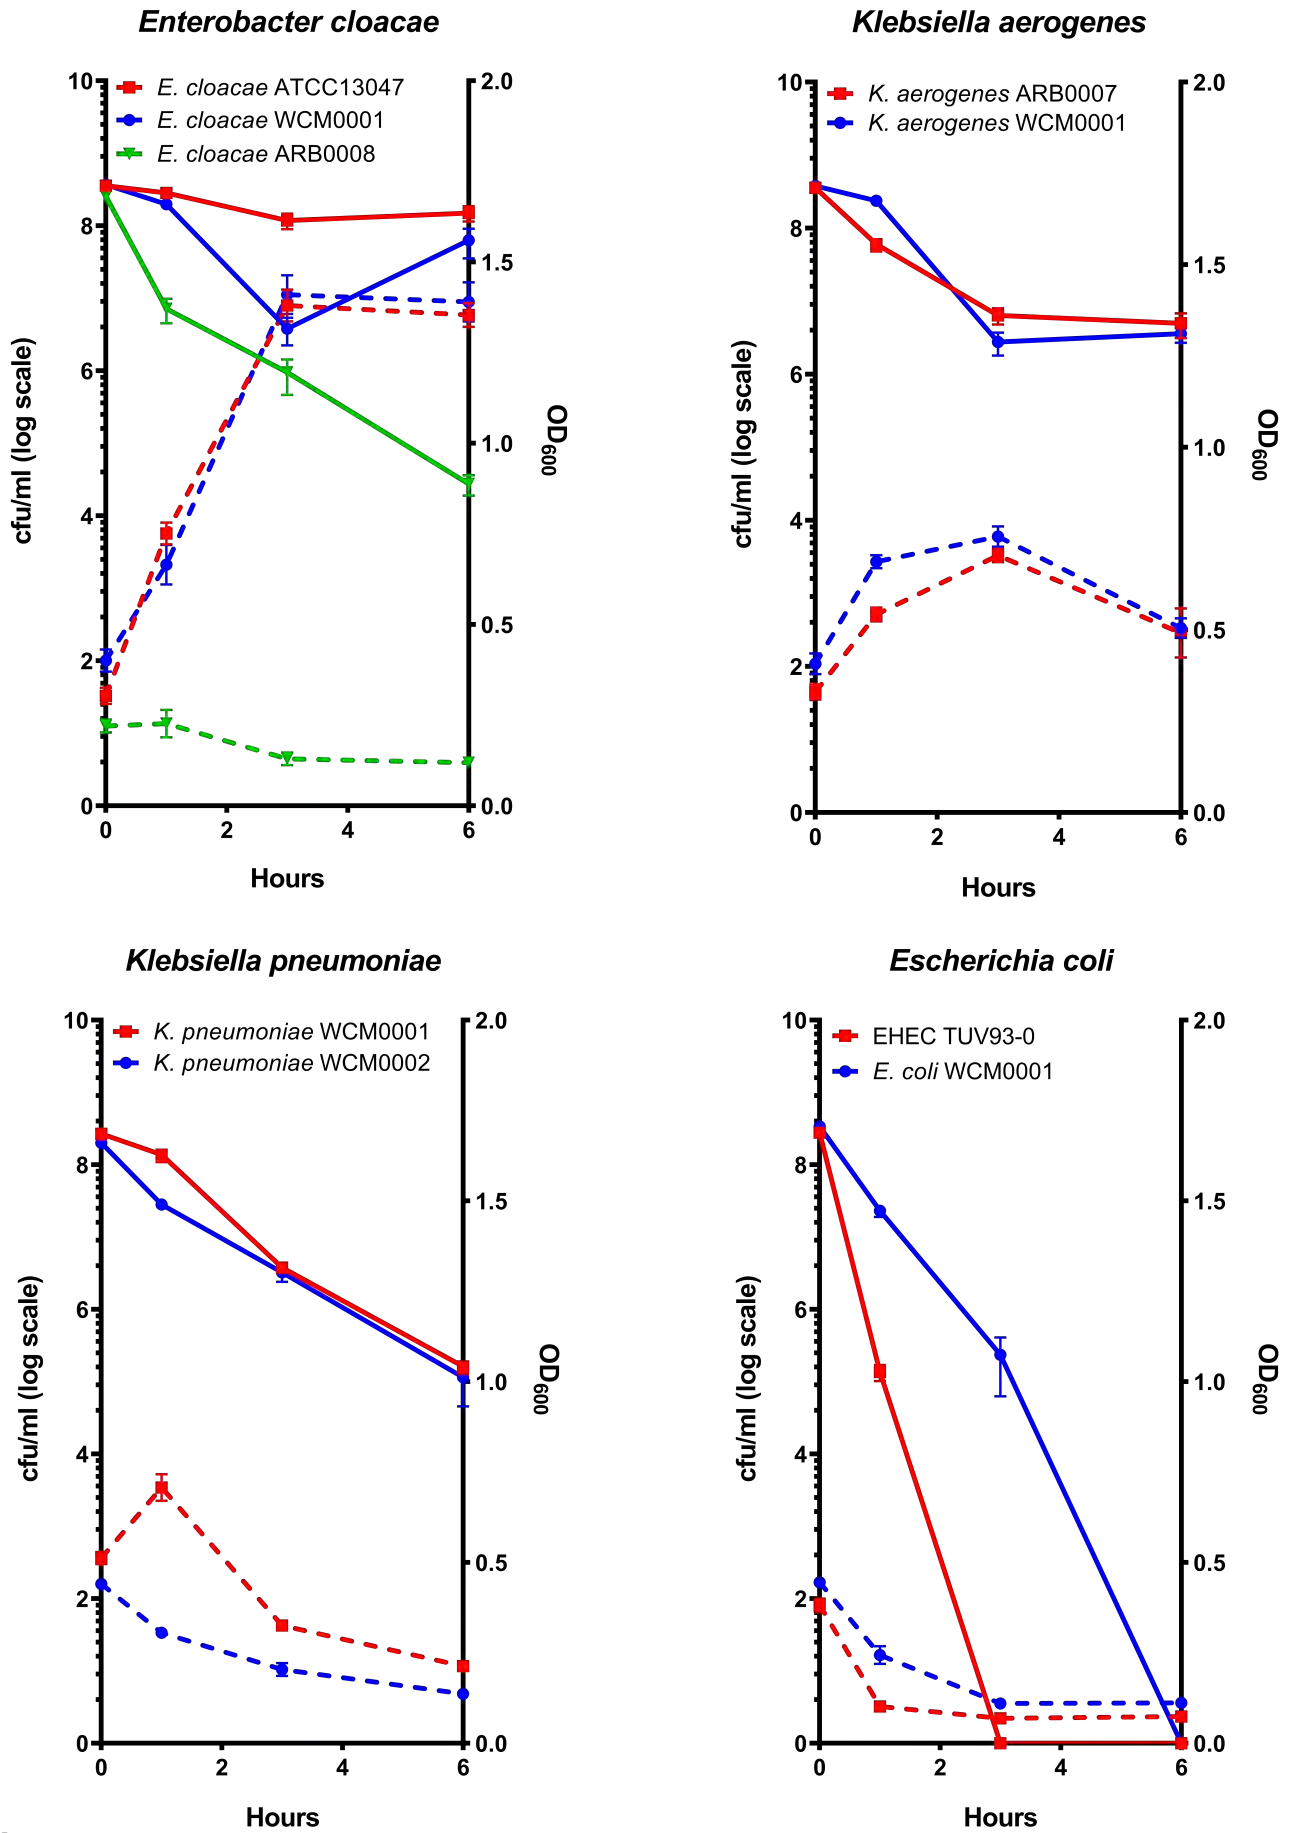

Fig. 1

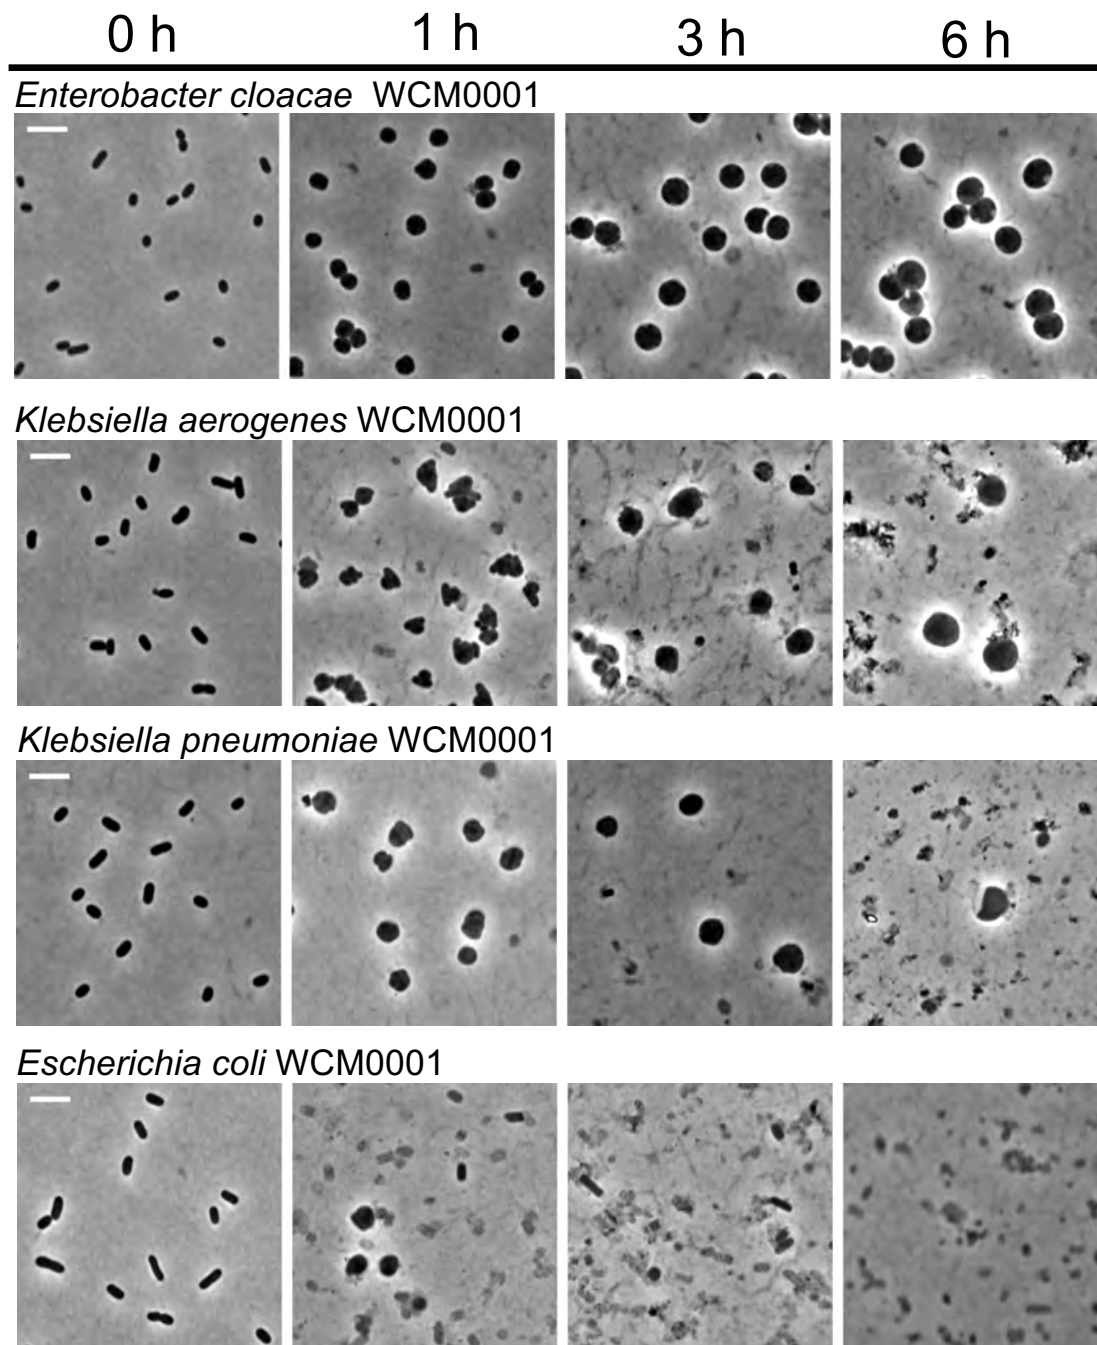

**Fig. 2**



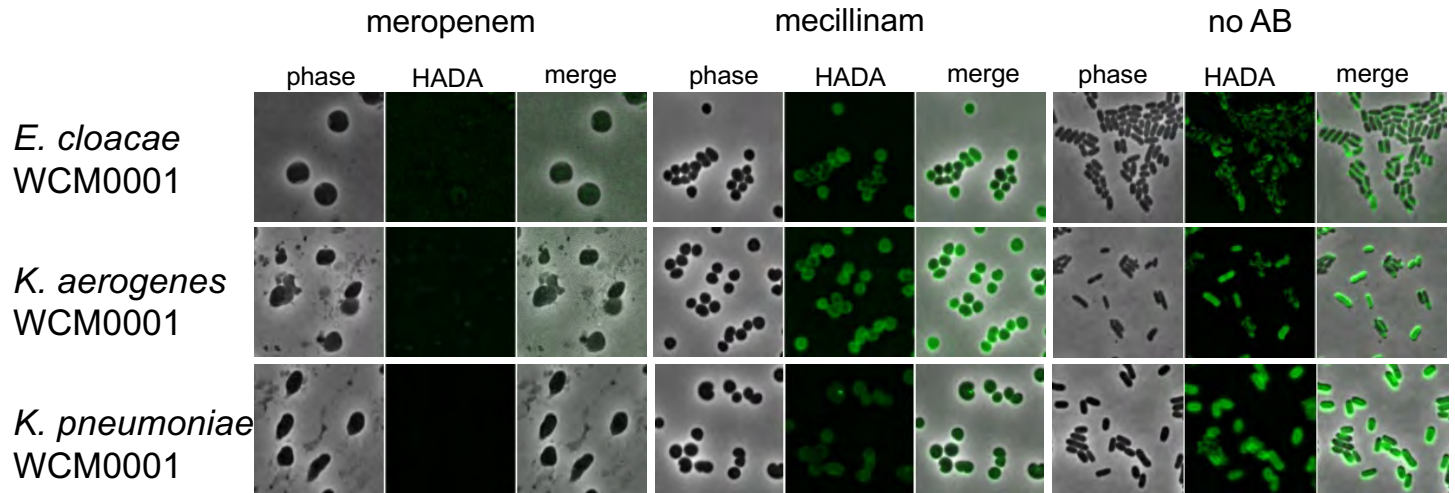

**Fig. 3**

*Enterobacter cloacae* WCM0001

time →

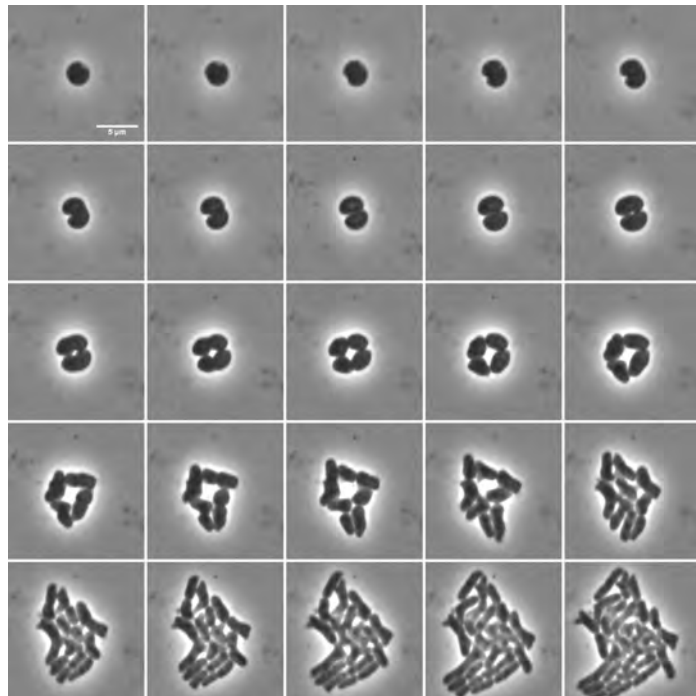

*Klebsiella aerogenes* WCM0001

time →

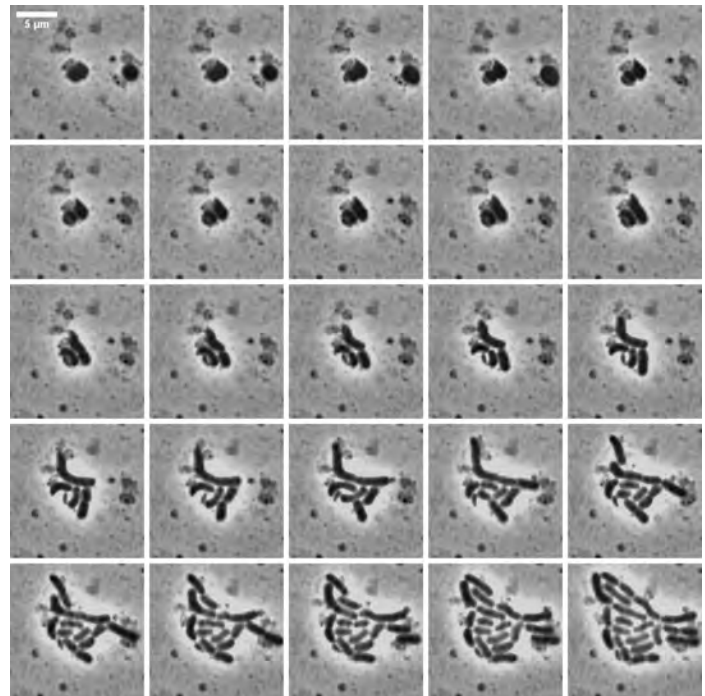

*Klebsiella pneumoniae* WCM0001

time →

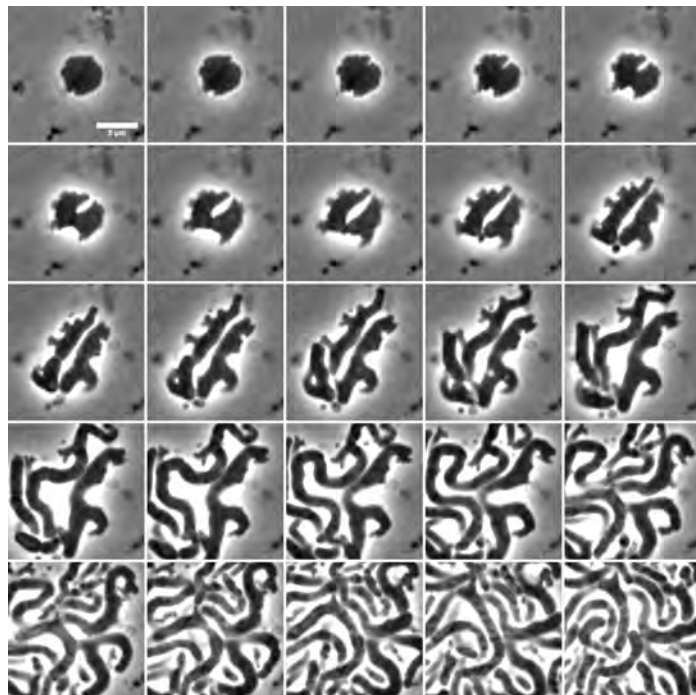

Fig. 4

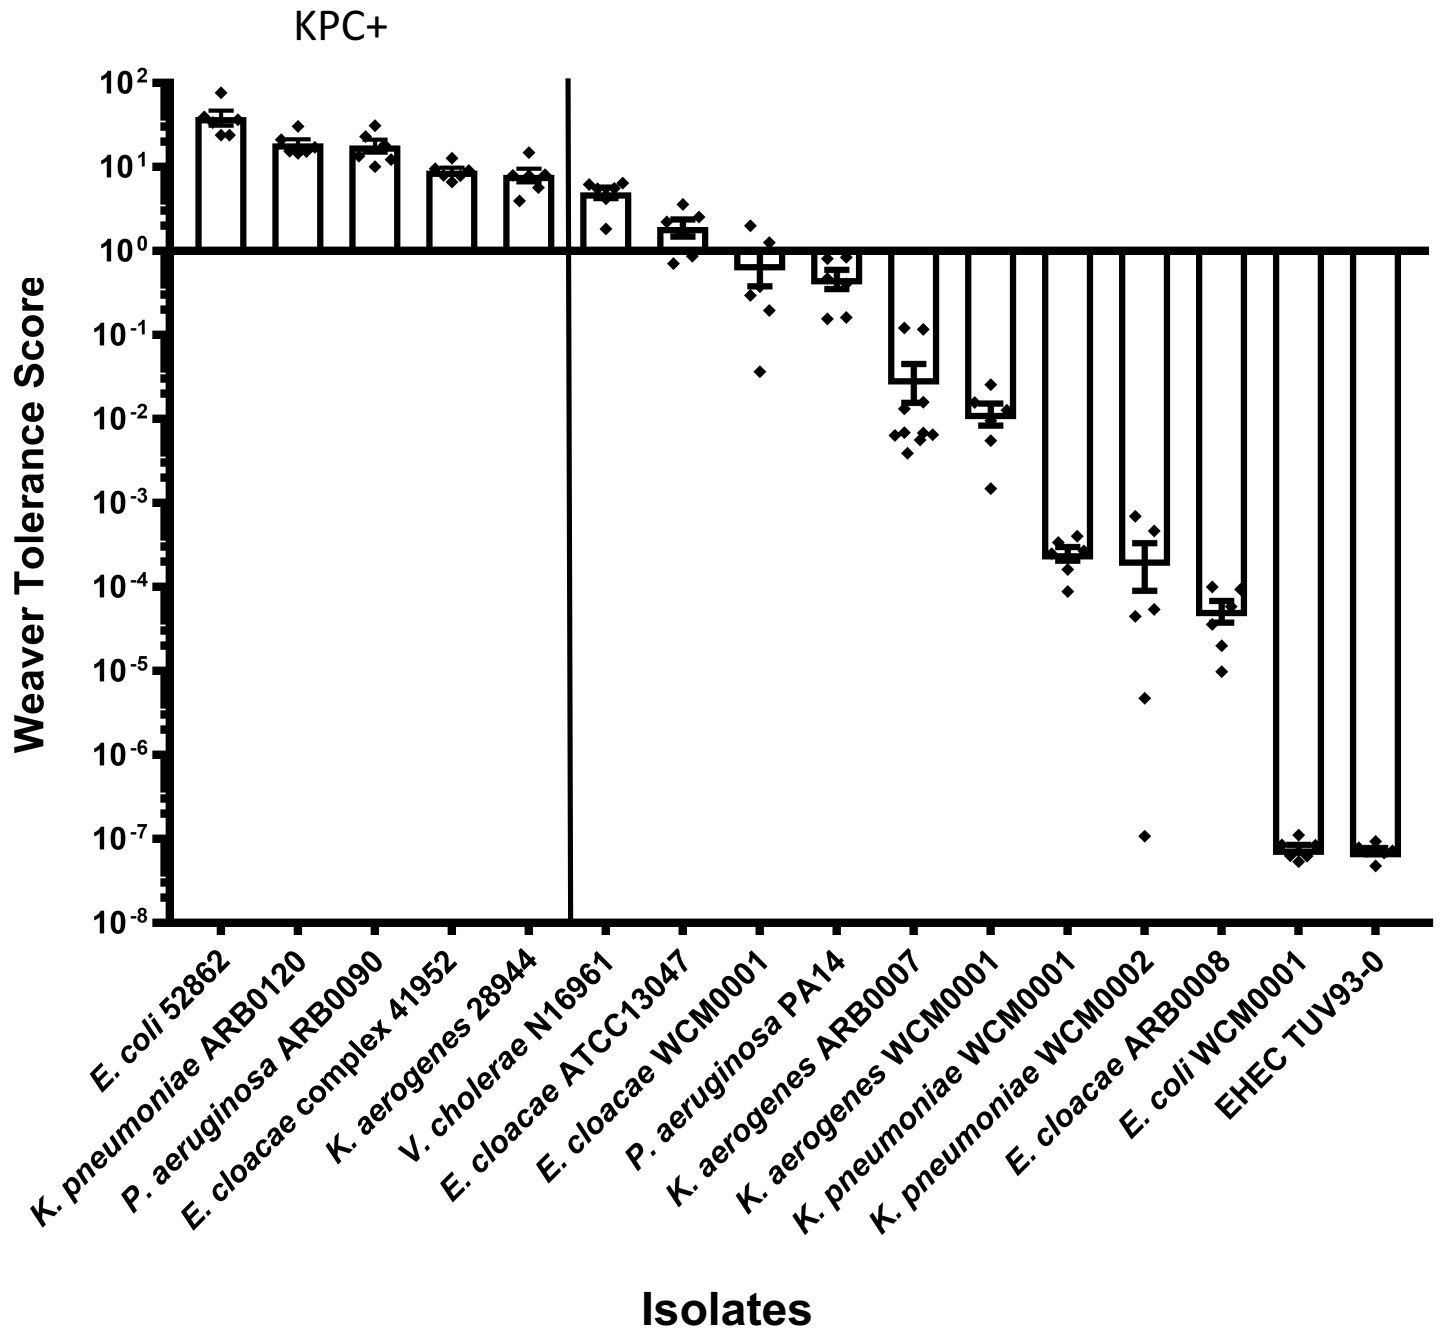

Fig. 5

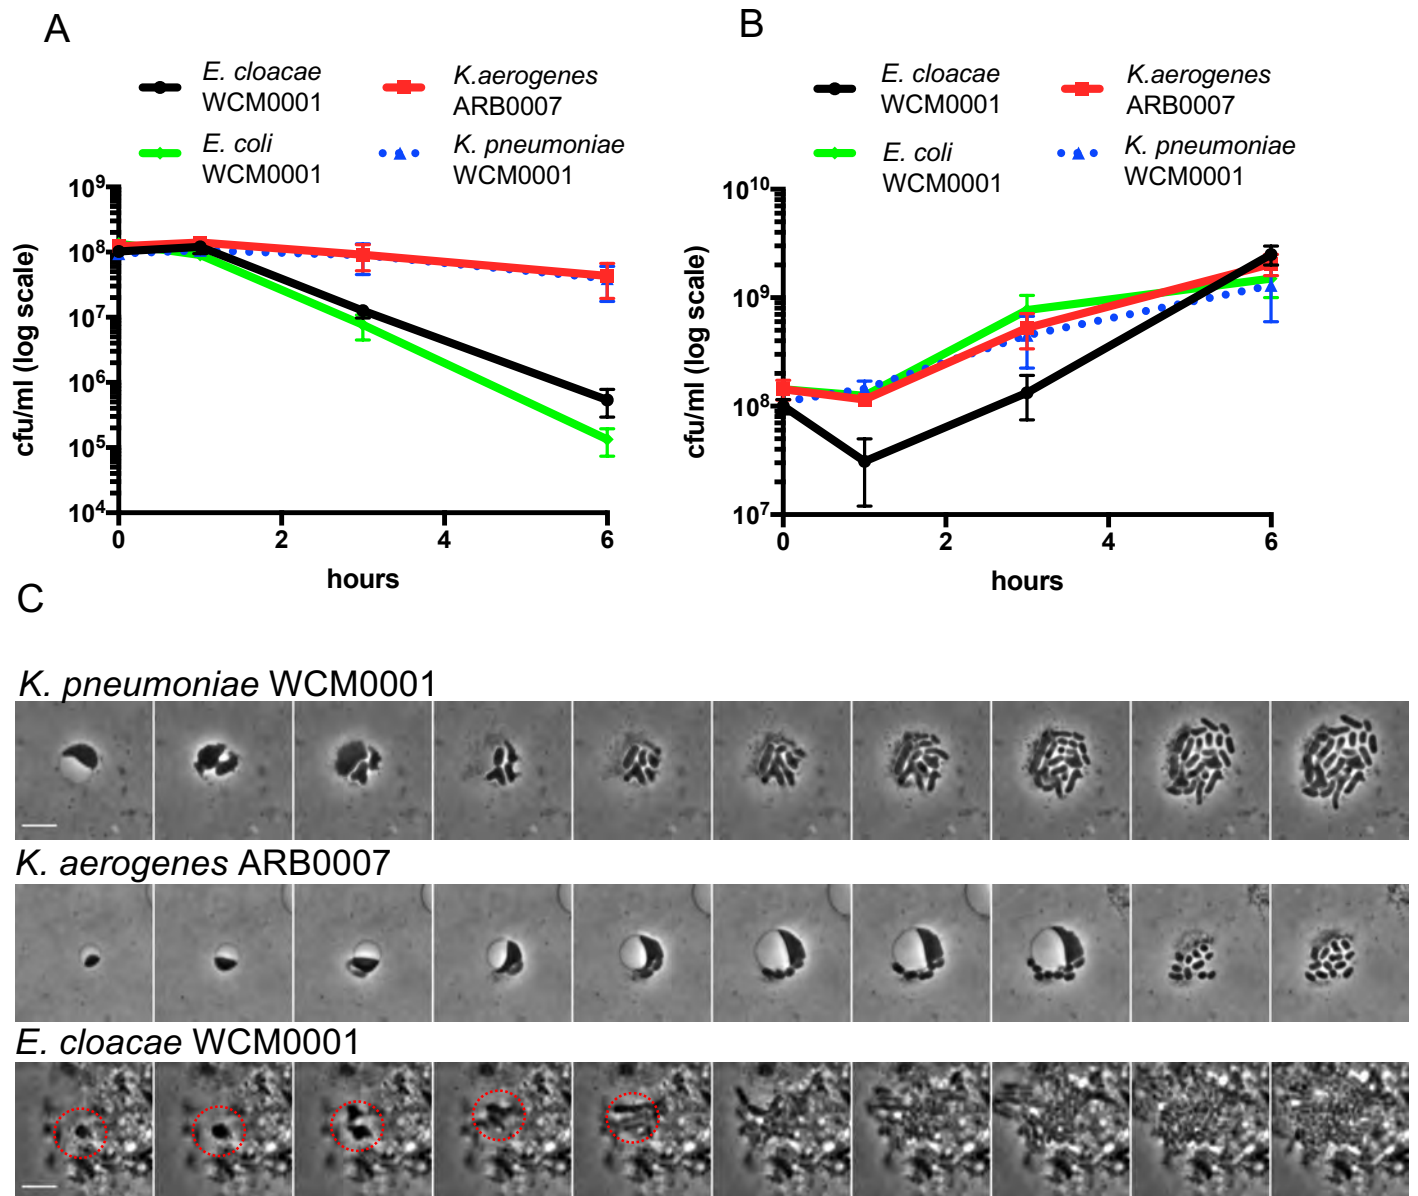

**Fig. 6**
